# Supplementary material for: Divergent Attitudes Toward COVID-19 Vaccine vs Influenza Vaccine
Source: PubMed Central journal article supplement (PMC10739094; doi:10.1001/jamanetworkopen.2023.49881), 2023-12-21
Supplement: jamanetwopen-e2349881-s002.pdf [file jamanetwopen-e2349881-s002.pdf]

## Data Sharing Statement

Steelfisher. Divergent Attitudes Toward COVID-19 Vaccine vs Influenza Vaccine. *JAMA Netw Open*. Published December 21, 2023. doi:10.1001/jamanetworkopen.2023.49881

### Data

**Data available:** No

### Additional Information

**Explanation for why data not available:** Additional publications from these data are forthcoming.
